# Supplementary material for: Thermally cross-linkable thermally activated delayed fluorescent materials for efficient blue solution-processed organic light-emitting diodes
Source: Royal Society of Chemistry journal article supplement (doi:10.1039/c6tc02634f), 2016-01-01
Supplement: c6tc02634f1.pdf [file c6tc02634f1.pdf]

Electronic Supplementary Information

## Thermally cross-linkable thermally activated delayed fluorescence materials for efficient blue solution-processed organic light-emitting diodes

Kaiyong Sun, Xiangfei Xie, Yao Liu, Wei Jiang,\* Xinxin Ban, Bin Huang, and Yueming Sun\*

School of Chemistry and Chemical Engineering, Southeast University, Nanjing, 210096, Jiangsu, P. R. China

\*e-mail: [101011462@seu.edu.cn](mailto:101011462@seu.edu.cn) (W. Jiang); e-mail: [sun@seu.edu.cn](mailto:sun@seu.edu.cn) (Y. Sun).

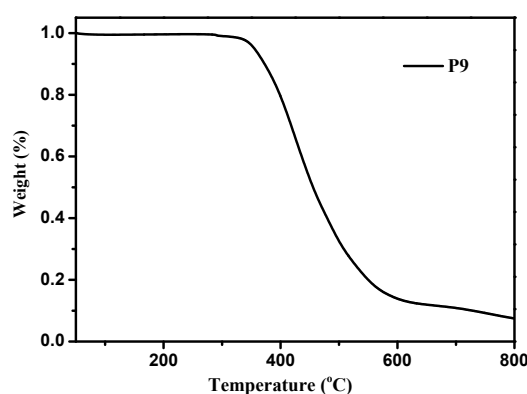

Figure S1. TGA of P9 at a heating rate of 10 °C min<sup>-1</sup>.

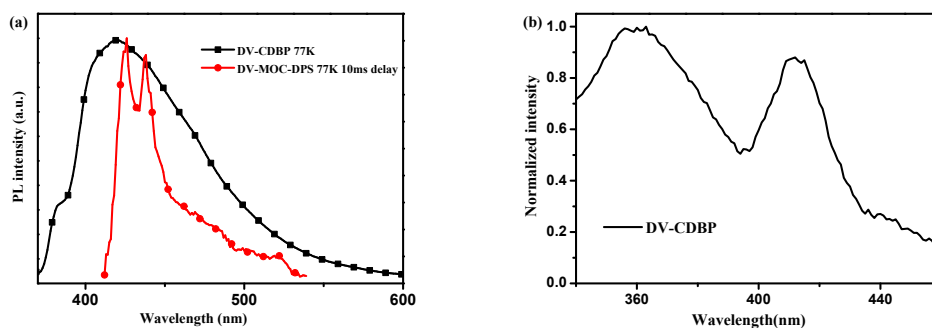

Figure S2. (a) PL spectra of DV-CDBP in toluene at 77K and DV-MOC-DPS at 77K with 10 ms delay; (b) PL spectra of cross-linked DV-CDBP film at 77K.

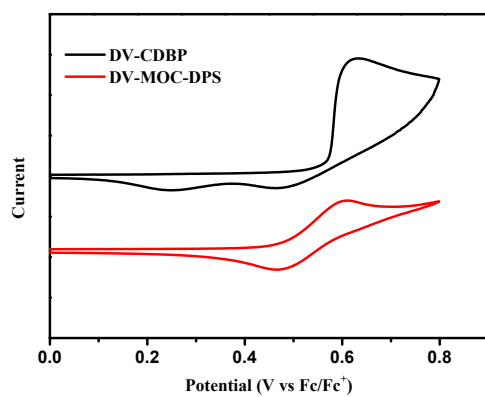

**Figure S3.** Oxidation part of the CV curves of DV-CDBP and DV-MOC-DPS in dichloromethane.

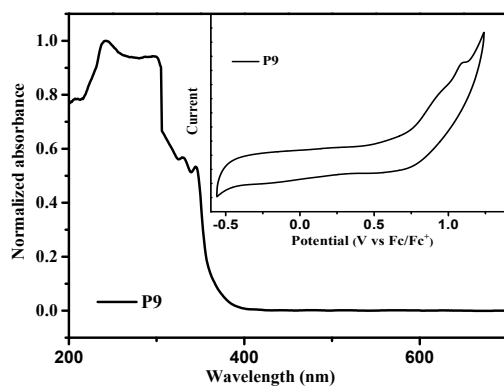

**Figure S4.** Absorption spectra of P9 in the thin film and Oxidation part of the CV curve of P9 (inset) in dichloromethane.

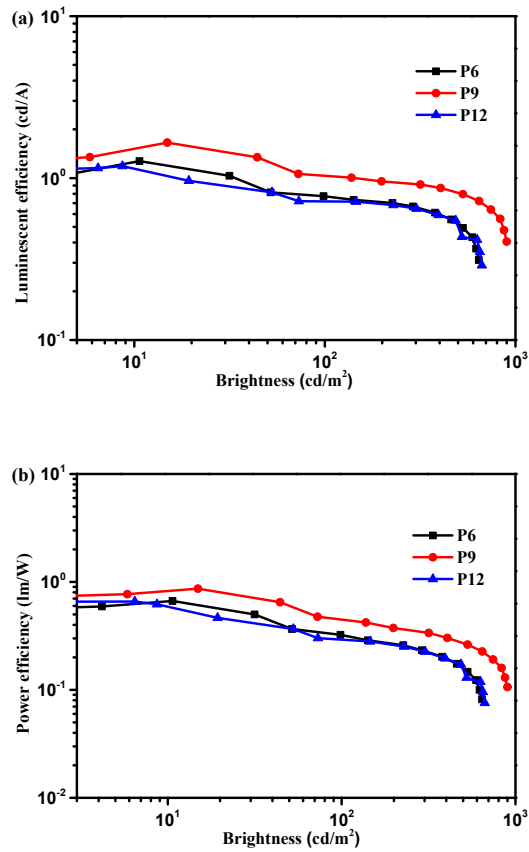

**Figure S5.** (a) Current efficiency versus luminance for the devices. (b) Power efficiency versus luminance for the devices.

**Table S1.** Comparison of the devices with P6, P9 and P12 as emitting layers

| Emitter | $V_{on}^a$<br>(V) | $\lambda_{peak}^b$<br>(nm) | $EQE_{max}^c$<br>(%) | $CE_{max}^d$ (cd<br>$A^{-1}$ ) | $PE_{max}^e$<br>(lm $W^{-1}$ ) | CIE<br>$(x, y)^f$ |
|---------|-------------------|----------------------------|----------------------|--------------------------------|--------------------------------|-------------------|
| P6      | 5.3               | 444                        | 1.4                  | 1.3                            | 0.7                            | (0.12, 0.13)      |
| P9      | 5.3               | 444                        | 2.0                  | 1.6                            | 0.9                            | (0.12, 0.13)      |
| P12     | 5.3               | 448                        | 1.2                  | 1.3                            | 0.7                            | (0.12, 0.15)      |

<sup>a</sup> The driving voltage at 1 cd m<sup>-2</sup>. <sup>b</sup> EL peak wavelength. <sup>c</sup> Maximum external quantum efficiency. <sup>d</sup> Maximum current efficiency. <sup>e</sup> Maximum power efficiency. <sup>f</sup> The Commission Internationale de L'Eclairage coordinates.
